# Supplementary material for: Colorimetric discrimination of nucleoside phosphates based on catalytic signal amplification strategy and its application to related enzyme assays
Source: Royal Society of Chemistry journal article supplement (doi:10.1039/d0an01918f), 2020-11-23
Supplement: d0an01918f1.pdf [file d0an01918f1.pdf]

## Supplementary information

# Colorimetric Discrimination of Nucleoside Phosphates Based on Catalytic Signal Amplification Strategy and its Application to Related Enzyme assays

Seungyoon Kang<sup>†</sup>, Byoung Yong Park<sup>†</sup>, Suji Lee, Nameol Lee, and Min Su Han\*

*Department of Chemistry, Gwangju Institute of Science and Technology (GIST), 123 Cheomdangwagi-ro, Buk-gu, Gwangju 61005, Republic of Korea*

\* E-mail: happyhan@gist.ac.kr

<sup>†</sup> Seungyoon Kang and Byoung Yong Park contributed equally to this work.

## Table of Contents

|                                                                                                                                                               |    |
|---------------------------------------------------------------------------------------------------------------------------------------------------------------|----|
| S1. Materials .....                                                                                                                                           | 3  |
| S2. Synthesis of H-bpmp Ligand .....                                                                                                                          | 4  |
| S2.1. Synthesis of 2,6-bis(chloromethyl)-4-methylphenol .....                                                                                                 | 4  |
| S2.2. Synthesis of 2,6-bis((bis(pyridin-2-ylmethyl)amino)methyl)-4-methylphenol (H-bpmp)<br>.....                                                             | 4  |
| S3. Screening colorimetric response of Mn <sub>2</sub> (bpmp)/ABTS/H <sub>2</sub> O <sub>2</sub> system in the presence of various<br>phosphate anions .....  | 5  |
| S4. Optimization of colorimetric response of the Mn <sub>2</sub> (bpmp)/ABTS/H <sub>2</sub> O <sub>2</sub> system .....                                       | 6  |
| S4.1. Effect of pH, temperature, and concentration of Mn <sub>2</sub> (bpmp) on the<br>Mn <sub>2</sub> (bpmp)/ABTS/H <sub>2</sub> O <sub>2</sub> system ..... | 6  |
| S4.2. Colorimetric response using 3,3',5,5'-tetramethylbenzidine (TMB) .....                                                                                  | 7  |
| S5. AMP titration and determination of limit of detection (LOD) .....                                                                                         | 8  |
| S6. Binding study between Mn <sub>2</sub> (bpmp) and AMP .....                                                                                                | 9  |
| S6.1. Mass based binding study.....                                                                                                                           | 9  |
| S6.2. ITC based binding study.....                                                                                                                            | 11 |
| S7. Effect of AMP in the reaction between Mn <sub>2</sub> (bpmp) and H <sub>2</sub> O <sub>2</sub> .....                                                      | 12 |
| S8. PDE assay .....                                                                                                                                           | 13 |
| S8.1. Inhibitory assay .....                                                                                                                                  | 13 |
| S9. Small molecule kinase assay .....                                                                                                                         | 14 |
| S9.1. Discrimination of ADP and ATP using Mn <sub>2</sub> (bpmp)/ABTS/H <sub>2</sub> O <sub>2</sub> system.....                                               | 14 |
| S9.2. Test of kinase substrate/product/inhibitor effect on the assay system .....                                                                             | 14 |
| S9.3. General method for kinase activity assay .....                                                                                                          | 15 |
| S9.4. Inhibitory screening for HK in a well-plate .....                                                                                                       | 16 |
| S9.5. Inhibitory assay for HK using NAG and NBG .....                                                                                                         | 17 |
| S9.6. Inhibitory assay for AcK using AITC.....                                                                                                                | 18 |
| S10. References .....                                                                                                                                         | 21 |
| S11. Spectra.....                                                                                                                                             | 22 |

## S1. Materials

2,6-Bis(hydroxymethyl)-*p*-cresol, manganese acetate tetrahydrate ( $\text{Mn}(\text{OAc})_2 \cdot 4\text{H}_2\text{O}$ ) and sodium perchlorate ( $\text{NaClO}_4$ ) were purchased from Sigma-Aldrich. 2,2'-Dipicolylamine and hydrogen peroxide 35% in water ( $\text{H}_2\text{O}_2$ ) were purchased from Tokyo Chemical Industry (TCI). Thionyl chloride ( $\text{SOCl}_2$ ), anhydrous sodium sulfate ( $\text{Na}_2\text{SO}_4$ ) and triethylamine ( $\text{Et}_3\text{N}$ ) were purchased from Daejung Chemical Industry. Sodium acetate trihydrate ( $\text{NaOAc} \cdot 3\text{H}_2\text{O}$ ) was purchased from Junsei Chemical Industry. 2,2'-Azino-bis(3-ethylbenzothiazoline-6-sulfonic acid) diammonium salt (ABTS) and 3,3',5,5'-tetramethylbenzidine (TMB) was purchased from Alfa-Aesar.

Adenosine 5'-monophosphate monohydrate from yeast (AMP), adenosine 5'-triphosphate disodium salt hydrate (ATP), adenosine 3',5'-cyclic monophosphate (cAMP), guanosine 5'-diphosphate sodium salt (GDP), guanosine 5'-triphosphate sodium salt hydrate (GTP), cytidine 5'-monophosphate disodium salt (CMP), cytidine-5'-triphosphate disodium salt (CTP), thymidine, sodium phosphate dibasic (Pi), and sodium pyrophosphate decahydrate (PPi) were purchased from Sigma-Aldrich. Adenosine 5'-diphosphate disodium salt hydrate (ADP) and cytidine 5'-diphosphate trisodium salt hydrate (CDP) was purchased from TCI. Guanosine 5'-monophosphate disodium salt hydrate (GMP) was purchased from Acros. Adenosine was purchased from Alfa-Aesar.

For enzyme assay, phosphodiesterase I (EC 3.1.4.1, from *Crotalus adamanteus venom*), hexokinase (EC 2.7.1.1, type F-300, from *Saccharomyces Cerevisiae*), acetate kinase (EC 2.7.2.1, from *Escherichia coli*), 3-isobutyl-1-methylxanthine (IBMX), glucose-6-phosphate sodium salt (G6P), lithium potassium acetyl phosphate (AcP), and magnesium perchlorate ( $\text{Mg}(\text{ClO}_4)_2$ ) were purchased from Sigma-Aldrich.  $\beta$ -D-glucose, N-acetyl-D-glucosamine (NAG), and N-benzoyl-D-glucosamine (NBG) were purchased from TCI. Allyl isothiocyanate (AITC) was purchased from Alfa-Aesar.

## S2. Synthesis of H-bpmp Ligand <sup>S1</sup>

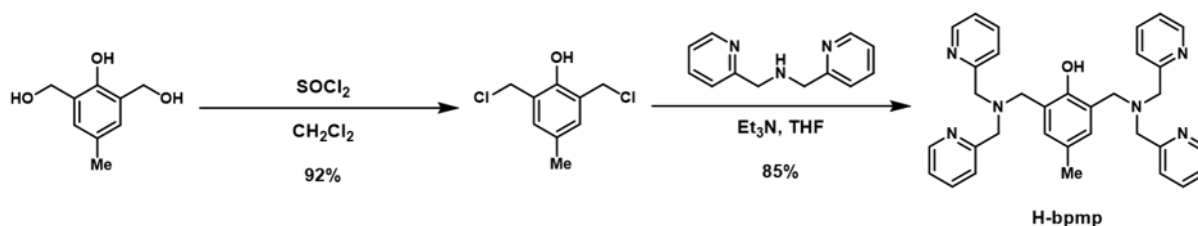

### S2.1. Synthesis of 2,6-bis(chloromethyl)-4-methylphenol

2,6-Bis(hydroxymethyl)-*p*-cresol (2.5 g, 15 mmol) in CH<sub>2</sub>Cl<sub>2</sub> (30 mL) was added to SOCl<sub>2</sub> (10 mL, 140 mmol). After stirring for 12 h, the yellow mixture was washed with water and brine. The organic layer was dried with Na<sub>2</sub>SO<sub>4</sub> and concentrated under the reduced pressure to give a white solid. Yield 2.8 g (92%). <sup>1</sup>H-NMR (400 MHz, CDCl<sub>3</sub>): δ 7.09 (s, 2H), 5.52 (s, 1H), 4.66 (s, 4H), 2.28 (s, 3H).

### S2.2. Synthesis of 2,6-bis((bis(pyridin-2-ylmethyl)amino)methyl)-4-methylphenol (H-bpmp)

2,6-Bis(chloromethyl)-4-methylphenol (2.8 g, 14 mmol) was dissolved in 30 mL of THF in an ice bath. Then, a solution of 2,2'-dipicolylamine (4.9 mL, 27 mmol) and Et<sub>3</sub>N (11.6 mL, 55 mmol) in 30 mL of THF was added dropwise. After stirring for 5 days at room temperature, the mixture was filtered and concentrated under reduced pressure. The mixture was dissolved in CH<sub>2</sub>Cl<sub>2</sub> then washed three times with brine. The organic layer was dried with Na<sub>2</sub>SO<sub>4</sub> and concentrated under reduced pressure. The mixture was hot filtered with diethyl ether to give a pale-yellow solid. Yield 6.2 g (85%). mp 105-107 °C; <sup>1</sup>H-NMR (400 MHz, DMSO-*d*<sub>6</sub>): δ 10.80 (s, 1H), 8.49 (dq, *J* = 4.9, 0.8 Hz, 4H), 7.72 (td, *J* = 7.7, 1.8 Hz, 4H), 7.47 (d, *J* = 7.8 Hz, 4H), 7.24 (ddd, *J* = 7.4, 4.9, 1.1 Hz, 4H), 6.97 (s, 2H), 3.75 (s, 8H), 3.66 (s, 4H), 2.17 (s, 3H); <sup>13</sup>C-NMR (101 MHz, DMSO-*d*<sub>6</sub>) δ 158.69, 153.24, 148.76, 136.86, 129.48, 126.44, 123.49, 122.62, 122.21, 58.88, 53.87, 20.31.

**S3. Screening colorimetric response of Mn<sub>2</sub>(bpmp)/ABTS/H<sub>2</sub>O<sub>2</sub> system in the presence of various phosphate anions**

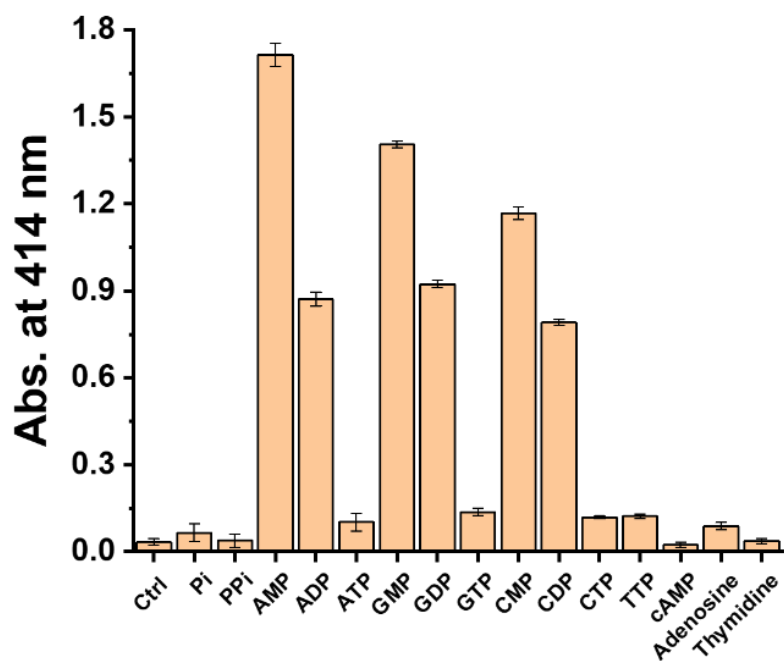

**Fig. S1** Screening of colorimetric response of Mn<sub>2</sub>(bpmp)/ABTS/H<sub>2</sub>O<sub>2</sub> system in the presence of various phosphate anions (0.5 mM) after 300 s in aqueous solution (20 mM pH 7.0 Tris buffer, 5% DMSO).

## S4. Optimization of colorimetric response of the $\text{Mn}_2(\text{bpmp})/\text{ABTS}/\text{H}_2\text{O}_2$ system

### S4.1. Effect of pH, temperature, and concentration of $\text{Mn}_2(\text{bpmp})$ on the $\text{Mn}_2(\text{bpmp})/\text{ABTS}/\text{H}_2\text{O}_2$ system

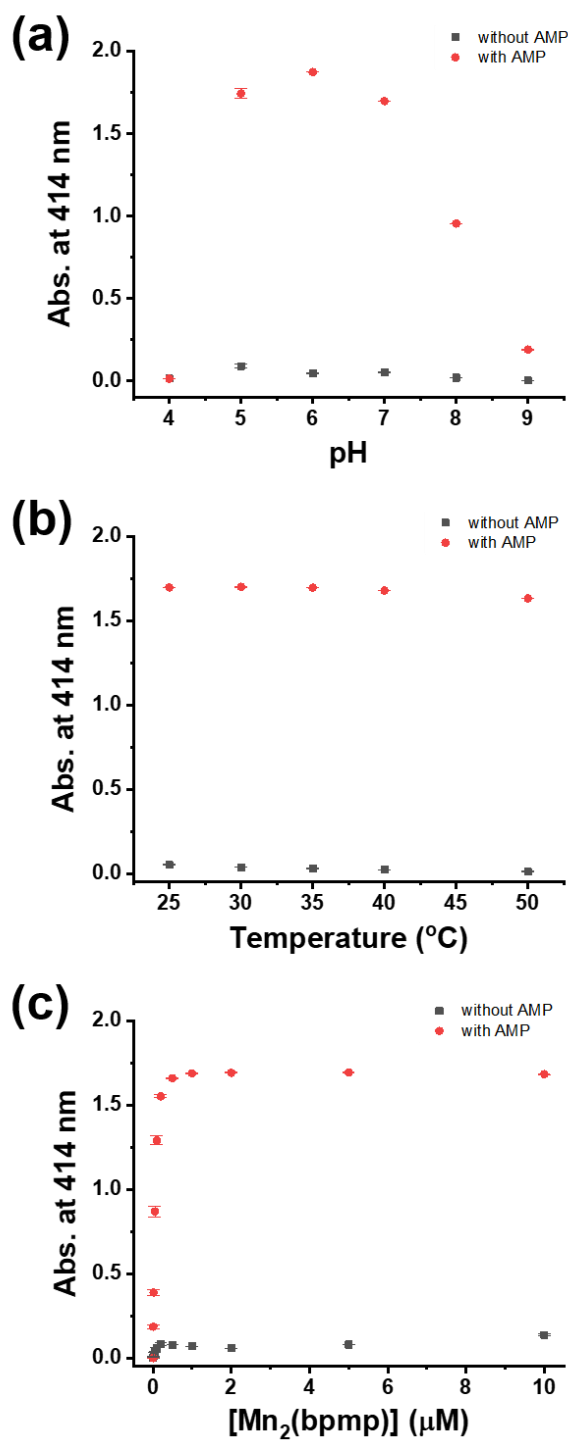

**Fig. S2** The effects of (a) pH 4-5 (acetate, 20 mM), pH 6 (MES, 20 mM), pH 7-9 (Tris, 20 mM), (b) temperature (25-50 °C), and (c) concentration of  $\text{Mn}_2(\text{bpmp})$  (0-10  $\mu\text{M}$ ) in the presence and absence of AMP.  $[\text{Mn}_2(\text{bpmp})] = 2 \mu\text{M}$ ,  $[\text{ABTS}] = 0.1 \text{ mM}$ ,  $[\text{AMP}] = 0.5 \text{ mM}$ ,  $[\text{H}_2\text{O}_2] = 10 \text{ mM}$ .

## S4.2. Oxidation of 3,3',5,5'-tetramethylbenzidine (TMB) by $Mn_2(bpmp)/H_2O_2$ system

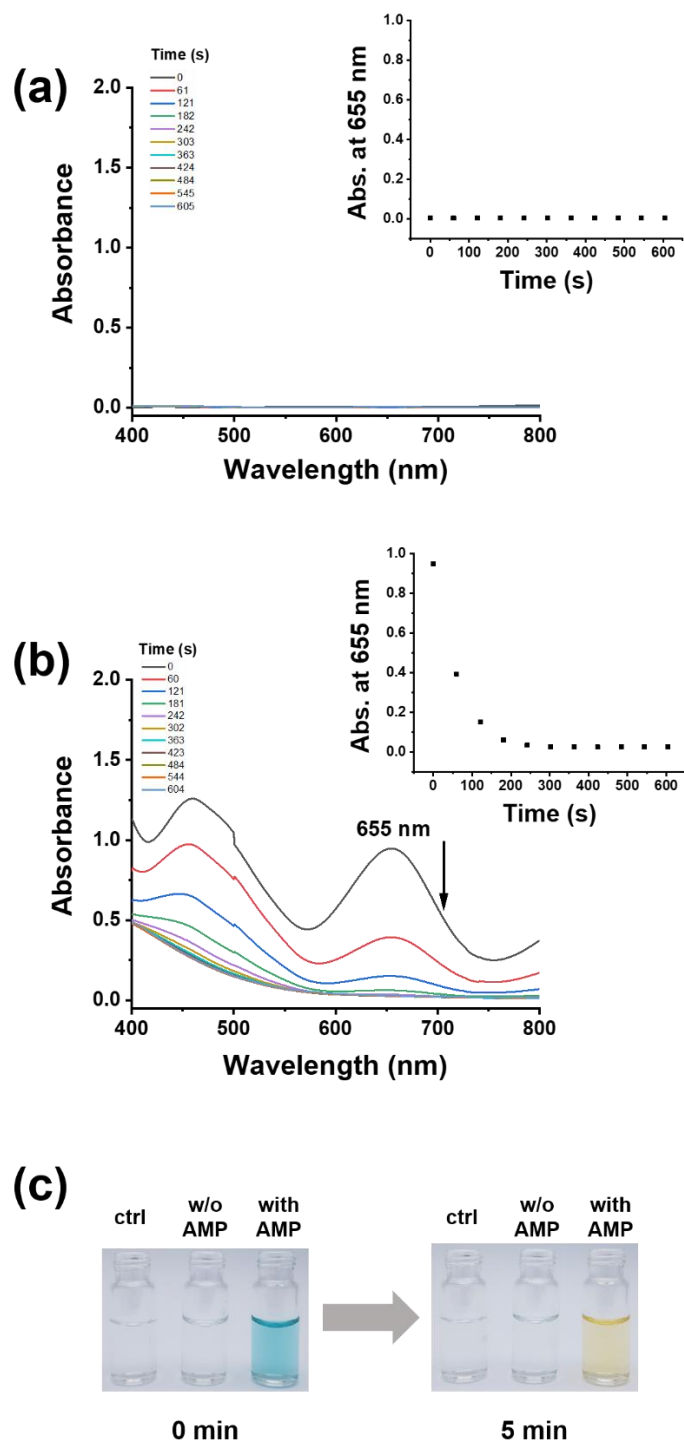

**Fig. S3** UV-Vis spectral changes of the  $Mn_2(bpmp)/TMB/H_2O_2$  system in the (a) absence and (b) presence of AMP in buffered solution (pH 7.0 Tris, 20 mM, DMSO 5%), Inset: Plot of the absorbance at 655 nm versus time. (c) Photograph of  $Mn_2(bpmp)/TMB/H_2O_2$  system without and with AMP.  $[Mn_2(bpmp)] = 2 \mu M$ ,  $[AMP] = 0.5 mM$ ,  $[TMB] = 0.1 mM$ ,  $[H_2O_2] = 10 mM$ .

## S5. AMP titration and determination of limit of detection (LOD)

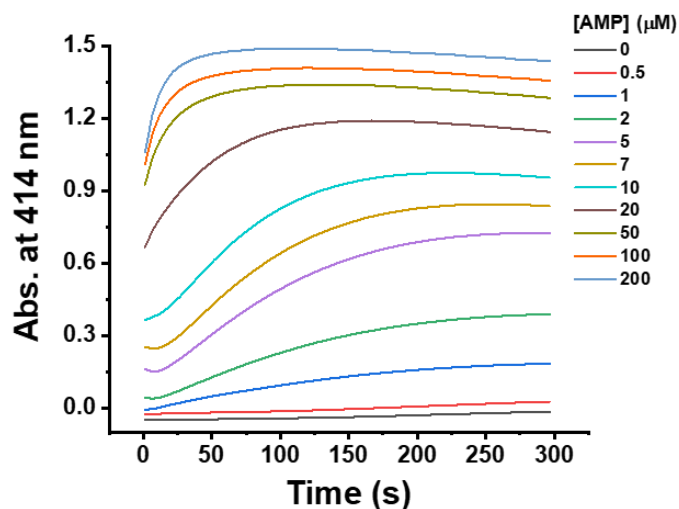

**Fig. S4** Change in the absorbance of the  $\text{Mn}_2(\text{bpmp})/\text{ABTS}/\text{H}_2\text{O}_2$  system in the presence of various AMP concentrations (0–200  $\mu\text{M}$ ).

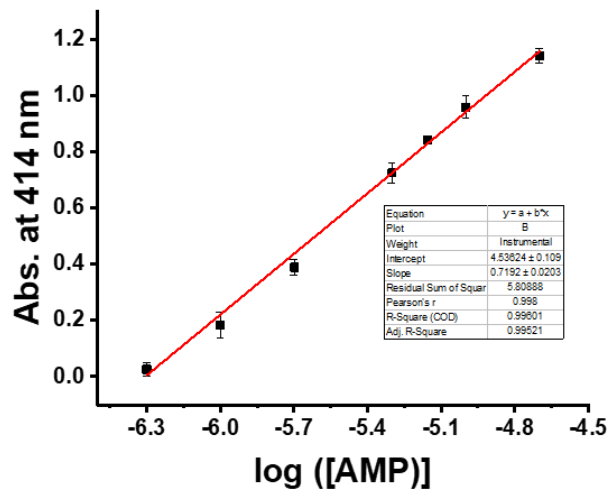

**Fig. S5** Limit of detection of AMP.<sup>3</sup>

The limit of detection (LOD) for AMP was obtained from the low concentration range of AMP (0.5–20  $\mu\text{M}$ ) in the AMP titration (see Fig. 1(b)). As shown in Fig. S5, a linear function was obtained when the x-axis is  $\log[\text{AMP}]$  and the y-axis is Abs. at 414 nm. The LOD was estimated from the x-intercept of this function.

$$\text{intercept} = 4.5362$$

$$\text{Slope} = 0.7192$$

$$R^2 = 0.99$$

$$\text{LOD} = 0.5 \mu\text{M}$$



## S6. Binding study between Mn<sub>2</sub>(bpmp) and AMP

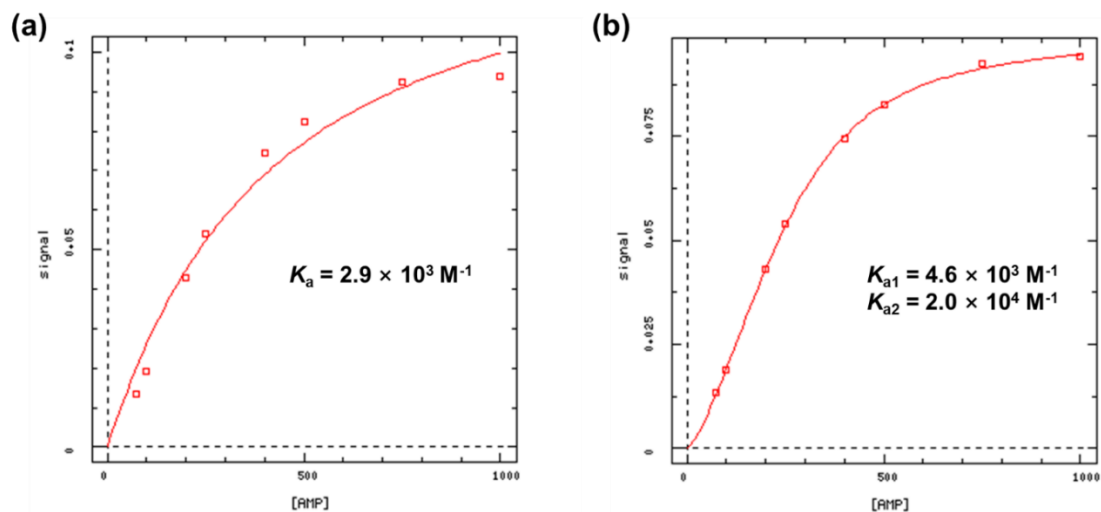

**Fig. S6** The absorption changes at 505 nm observed from AMP titration and the fitting to two binding model; (a) 1:1 binding model, (b) 1:1 and 1:2 binding model.

### S6.1. Mass based binding study

To identify AMP-Mn<sub>2</sub>(bpmp) adduct mass analysis was conducted. To a buffered solution (200  $\mu\text{M}$  pH 7 Tris, 0.5% DMSO) of Mn<sub>2</sub>(bpmp), AMP (100  $\mu\text{M}$ ) was added then allowed to equilibrate for 30 min before measurements. The final concentration following as: [Mn<sub>2</sub>(bpmp)] = 10  $\mu\text{M}$ , [AMP] = 100  $\mu\text{M}$ . As shown in Fig. S7, both 1:1 and 2:1 adduct was founded.

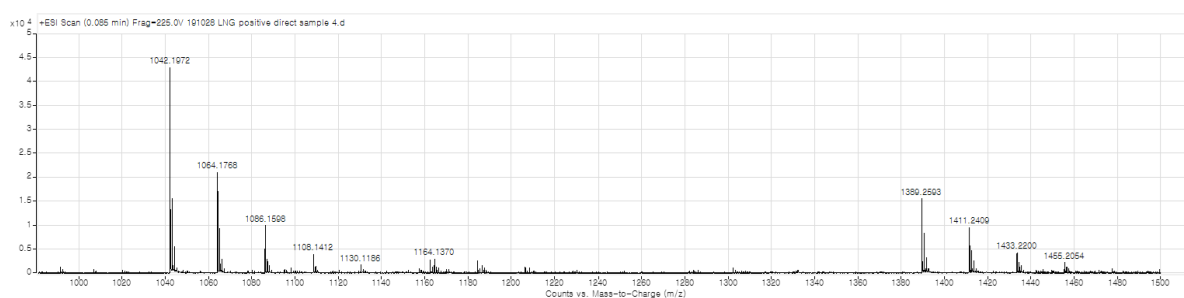

**Fig. S7** Mass spectrum of AMP-Mn<sub>2</sub>(bpmp) adduct.

**Table S1.** Assignments of mass spectrometry peaks.

| found<br><i>m/z</i> | Compound<br>(calcd)                                                            | Manganese oxidation state |
|---------------------|--------------------------------------------------------------------------------|---------------------------|
| 1042.1972           | [Mn <sub>2</sub> (bpmp)(μ-OAc)(AMP)] <sup>+</sup><br>(1042.2000)               | III, III                  |
| 1389.2593           | [Mn <sub>2</sub> (bpmp)(μ-OAc)(AMP) <sub>2</sub> ] <sup>+</sup><br>(1389.2631) | III, III                  |

*The peak of 1164.1370 was found to be impurity signal in blank sample.*

## S6.2. ITC based binding study

Aqueous  $\text{Mn}_2(\text{bpmp})$  (0.2 M pH 7 HEPES-NaOH, 5 % DMSO, 0.25 and 0.5 mM) and phosphate derivatives (0.2 M pH 7 HEPES-NaOH, 5 % DMSO, 5 mM) were prepared, respectively. The samples were extensively degassed prior to titration to prevent air bubble formation during the procedure. The  $\text{Mn}_2(\text{bpmp})$  solution (1 mL) was placed in the sample cell of the calorimeter, and phosphate derivatives (250  $\mu\text{L}$ ) were loaded in the syringe. Then, phosphate derivative solutions (10.0  $\mu\text{L}$  per injection) were titrated with 300 s intervals into the  $\text{Mn}_2(\text{bpmp})$  solution over 7,500 s at 25  $^\circ\text{C}$ . Through the ITC measurement, the thermodynamic information including heat rate curve depending on time, entropy change ( $\Delta S$ , cal/mol·K), enthalpy change ( $\Delta H$ , kcal/mol), association constant ( $K_a$ ,  $\text{M}^{-1}$ ), and molar ratio of the reaction ( $n$ ) was obtained.

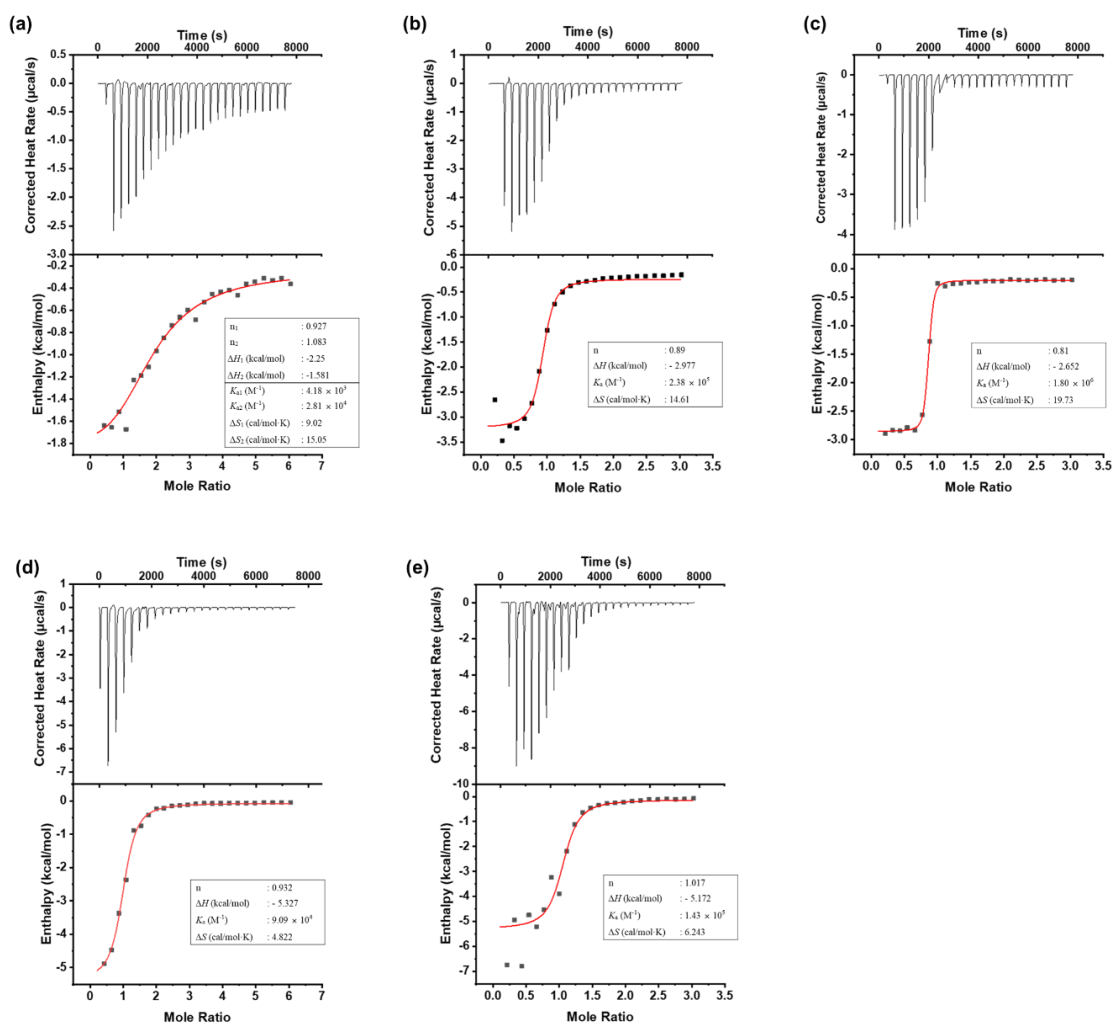

**Fig. S8** ITC data; Top: heat rate along with reaction time, Bottom: the normalized fit curve of  $\Delta H$  depending on mole ratio of the phosphate derivatives/ $\text{Mn}_2(\text{bpmp})$ . (a) AMP, (b) ADP, (c) ATP, (d) Pi, and (e) PPi.

**Table S2.** Thermodynamic parameter of binding event of Mn<sub>2</sub>(bpmp) and phosphate derivatives from ITC.

| Thermodynamic parameter  | AMP                                                                | ADP                | ATP                | Pi                 | PPi                |
|--------------------------|--------------------------------------------------------------------|--------------------|--------------------|--------------------|--------------------|
| n                        | 0.927 ( $n_1$ )<br>1.083 ( $n_2$ )                                 | 0.89               | 0.81               | 0.932              | 1.017              |
| $K_a$ (M <sup>-1</sup> ) | $4.18 \times 10^3$ ( $K_{a1}$ )<br>$2.81 \times 10^4$ ( $K_{a2}$ ) | $2.38 \times 10^5$ | $1.80 \times 10^6$ | $9.09 \times 10^4$ | $1.43 \times 10^5$ |
| $\Delta H$ (kcal/mol)    | -2.25 ( $\Delta H_1$ )<br>-1.581 ( $\Delta H_2$ )                  | -2.977             | -2.652             | -5.327             | -5.172             |
| $\Delta S$ (cal/mol K)   | 9.02 ( $\Delta S_1$ )<br>15.05 ( $\Delta S_2$ )                    | 14.61              | 19.73              | 4.822              | 6.243              |

### S7. Effect of AMP in the reaction between Mn<sub>2</sub>(bpmp) and H<sub>2</sub>O<sub>2</sub>

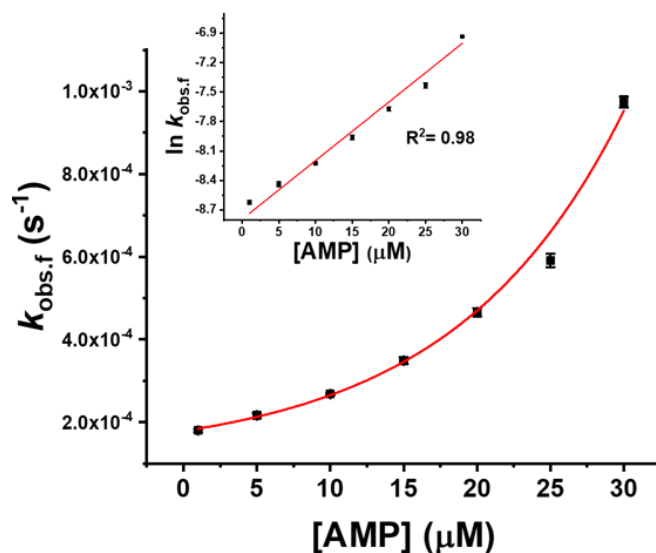

**Fig. S9** Change of  $k_{obs}$  during the reaction of Mn<sub>2</sub>(bpmp) (100 μM) with H<sub>2</sub>O<sub>2</sub> (1 mM) in a buffered solution (pH 7.0) in the absence and presence of AMP; Inset:  $\ln k_{obs}$  vs. AMP concentration.

## S8. PDE assay

### S8.1. Inhibitory assay

To buffered solution (20 mM, pH 7 Tris) containing PDE (5 mU/mL) and different concentration of IBMX (10, 40, 100, 150, 200, 400  $\mu\text{M}$ ), cAMP (1 mM) was added. After 10 min at 25  $^{\circ}\text{C}$ ,  $\text{Mn}_2(\text{bpm})$  (2  $\mu\text{M}$ ), ABTS (0.5 mM),  $\text{H}_2\text{O}_2$  (4 mM) was added. After 10 s, UV-vis spectra were recorded at 414 nm at 2 s intervals for 300 s. Using the absorbance at 414 nm (100 s), plotting was performed for concentration of IBMX.

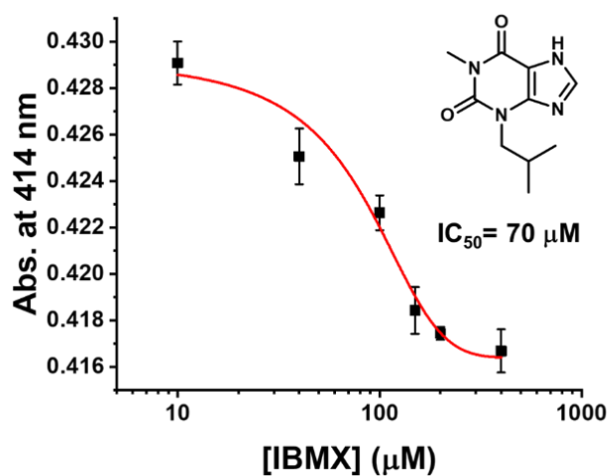

Fig. S10 Inhibitory assay for PDE using IBMX

## S9. Small molecule kinase assay

### S9.1. Discrimination of ADP and ATP using $\text{Mn}_2(\text{bpmp})/\text{ABTS}/\text{H}_2\text{O}_2$ system

Various ratios of ATP to ADP (total concentration set to  $2.0 \mu\text{M}$ ) were added to a buffer solution (HEPES-NaOH, 20 mM, pH 7.0) containing ABTS ( $100 \mu\text{M}$ ),  $\text{Mn}_2(\text{bpmp})$  ( $2 \mu\text{M}$ , 5% DMSO), and  $\text{Mg}(\text{ClO}_4)_2$  ( $100 \mu\text{M}$ ). One minute after adding  $\text{H}_2\text{O}_2$  (10 mM) to the above solution, the UV-vis spectra were recorded for 300 s.

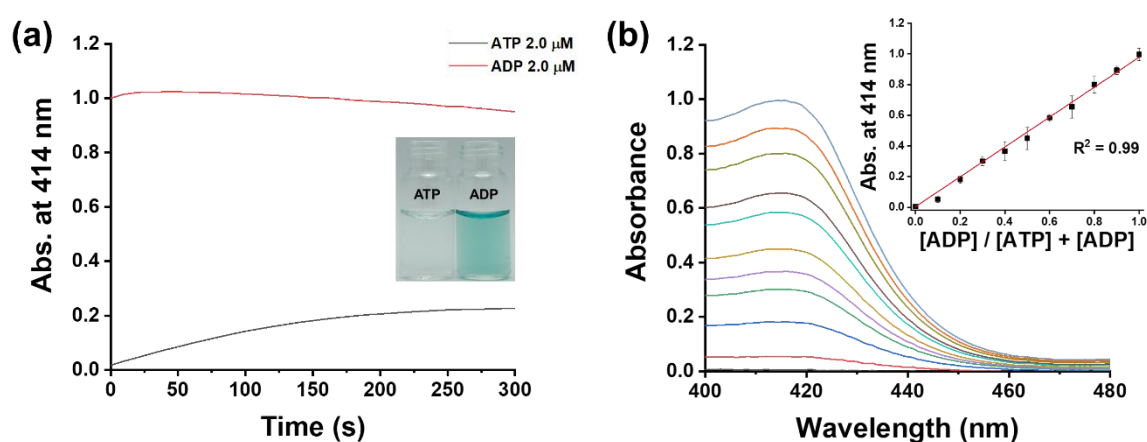

**Fig. S11** (a) Time dependent increase in absorbance of the  $\text{Mn}_2(\text{bpmp})/\text{ABTS}/\text{H}_2\text{O}_2$  system at 414 nm in the presence of  $2.0 \mu\text{M}$  of ATP or ADP. Inset: corresponding color 1 min after  $\text{H}_2\text{O}_2$  addition. (b) Change in the absorption spectra with varying ratios of ADP/ATP,  $[\text{ADP}] + [\text{ATP}] = 2 \mu\text{M}$ . Inset: Absorbance at 414 nm as a function of ADP ratio.

### S9.2. Test of kinase substrate/product/inhibitor effect on the assay system

To buffered solution (HEPES-NaOH, 20 mM, pH 7.0) containing ABTS ( $100 \mu\text{M}$ ),  $\text{Mn}_2(\text{bpmp})$  ( $2 \mu\text{M}$ , 5% DMSO),  $\text{Mg}(\text{ClO}_4)_2$  ( $100 \mu\text{M}$ ), and ATP ( $2 \mu\text{M}$ ), kinase substrate, product, inhibitor or enzyme was added. One minute after adding  $\text{H}_2\text{O}_2$  (10 mM) to the above solution, the UV-vis spectra were recorded at 414 nm at 10 s intervals for 10 min. The final concentration:  $[\text{ADP}] = 2 \mu\text{M}$ ,  $[\text{Glucose}] = 1 \text{ mM}$ ,  $[\text{Sodium acetate}] = 5 \text{ mM}$ , glucose-6-phosphate sodium salt (G6P)  $[\text{G6P}] = 2 \mu\text{M}$ , lithium potassium acetyl phosphate (AcP)  $[\text{AcP}] = 2 \mu\text{M}$ ,  $[\text{NAG}] = 10 \text{ mM}$ ,  $[\text{NMG}] = 5 \text{ mM}$ ,  $[\text{AITC}] = 200 \mu\text{M}$ ,  $[\text{HK}] = 1 \text{ U/mL}$ , and  $[\text{AcK}] = 1 \text{ U/mL}$ .

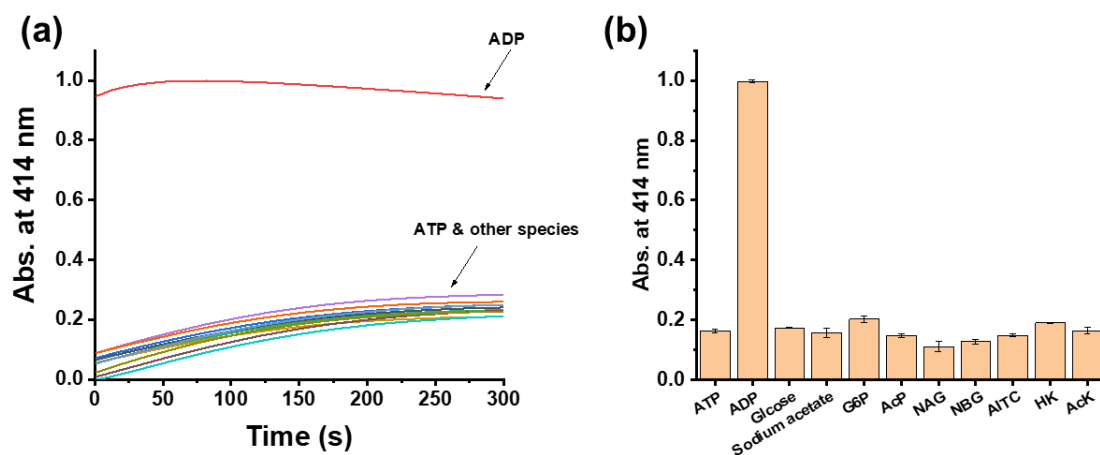

**Fig. S12** (a) The time-resolved absorbance of  $\text{Mn}_2(\text{bpmp})/\text{ABTS}/\text{H}_2\text{O}_2$  system in the presence of kinase substrate, product, inhibitor or enzyme (b) Plot of absorbance of 414 nm at 100 s.

### S9.3. General method for kinase activity assay

To a buffered solution (HEPES-NaOH, 20 mM, pH 7.0) containing [ABTS (100  $\mu\text{M}$ ),  $\text{Mn}_2(\text{bpmp})$  (2  $\mu\text{M}$ , 5% DMSO),  $\text{Mg}(\text{ClO}_4)_2$  (100  $\mu\text{M}$ ), substrate (glucose (1 mM) or acetate (5 mM)), and ATP (2  $\mu\text{M}$ )],  $\text{H}_2\text{O}_2$  (10 mM) was added. After 1 min, various concentrations of hexokinase (from 0.01 to 0.3 U/mL) or acetate kinase (from 0.2 to 1.0 U/mL) were added. With no further incubation, UV-Vis spectra were recorded at 414 nm at 10 s intervals for 10 min. The observed rate ( $k_{\text{obs}}$ ) of the reaction was determined based on the change in absorbance at 414 nm for 2 min.

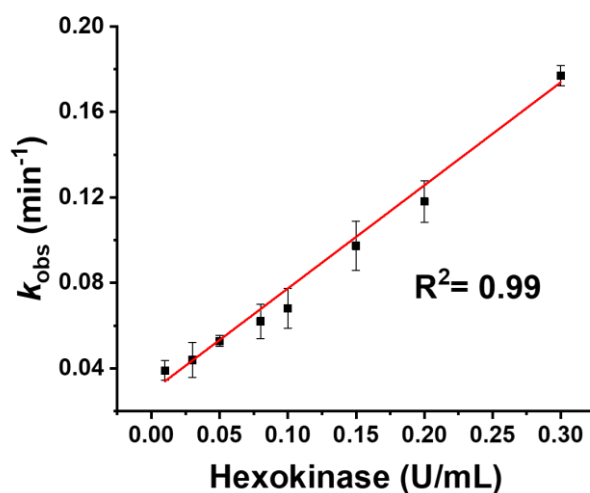

Fig. S13 Change in  $k_{obs}$  as a function of hexokinase concentrations.

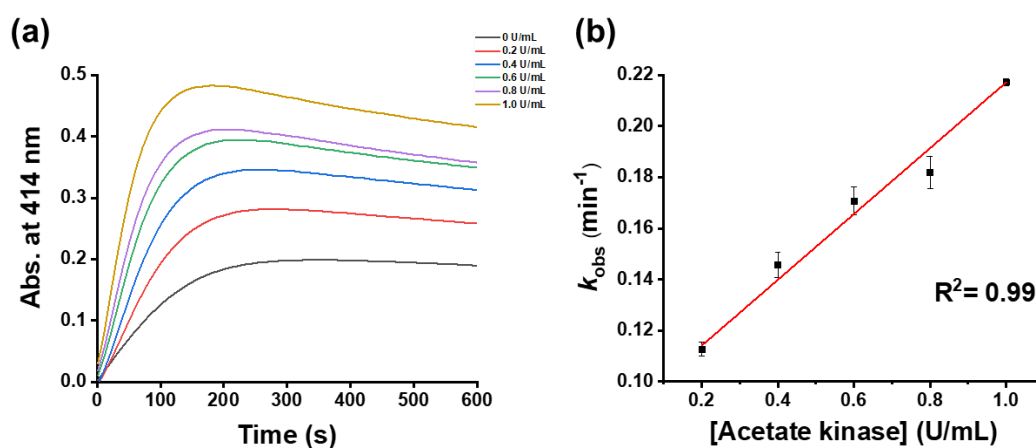

Fig. S14 (a) Real-time monitoring of different concentration of acetate kinase using the time-resolved absorbance of  $\text{Mn}_2(\text{bpmp})/\text{ABTS}/\text{H}_2\text{O}_2$  system. (b) Change of  $k_{obs}$  versus concentrations of acetate kinase.

#### S9.4. Inhibitory screening for HK in a well-plate

To a buffer solution (HEPES-NaOH, 20 mM, pH 7.0) containing [ABTS (1 mM),  $\text{Mn}_2(\text{bpmp})$  (2  $\mu\text{M}$ , 5% DMSO),  $\text{Mg}(\text{ClO}_4)_2$  (100  $\mu\text{M}$ ), glucose (100  $\mu\text{M}$ ), ATP (2  $\mu\text{M}$ ) and NAG, NBG, or AITC (5 mM)],  $\text{H}_2\text{O}_2$  (10 mM) was added. After 1 min, hexokinase (1.0 U/mL) was added. Photographs was captured on a SAMSUNG GALAXY Note 8.



### S9.5. Inhibitory assay for HK using NAG and NBG

To a buffer solution (HEPES-NaOH, 20 mM, pH 7.0) containing [ABTS (100  $\mu$ M),  $Mn_2$ (bpmpp) (2  $\mu$ M, 5% DMSO),  $Mg(ClO_4)_2$  (100  $\mu$ M), glucose (100  $\mu$ M), ATP (2  $\mu$ M), and various concentrations of NAG or NBG],  $H_2O_2$  (10 mM) was added. After 1 min, hexokinase (0.1 U/mL) was added. With no further incubation, UV-Vis spectra were recorded at 414 nm at 10 s intervals for 10 min. Inhibition efficiency was defined by the following equation:

$$\text{Inhibition efficiency (\%)} = [(A_{\text{con.}} - A_{\text{sample}})/(A_{\text{con.}} - A_{\text{blank}})] \times 100 (\%)$$

$A_{\text{con.}}$ : Absorbance of 414 nm at 10 min without inhibitor.

$A_{\text{sample}}$ : Absorbance of 414 nm at 10 min with various concentration of inhibitor.

$A_{\text{blank}}$ : Absorbance of 414 at 10 min without HK.

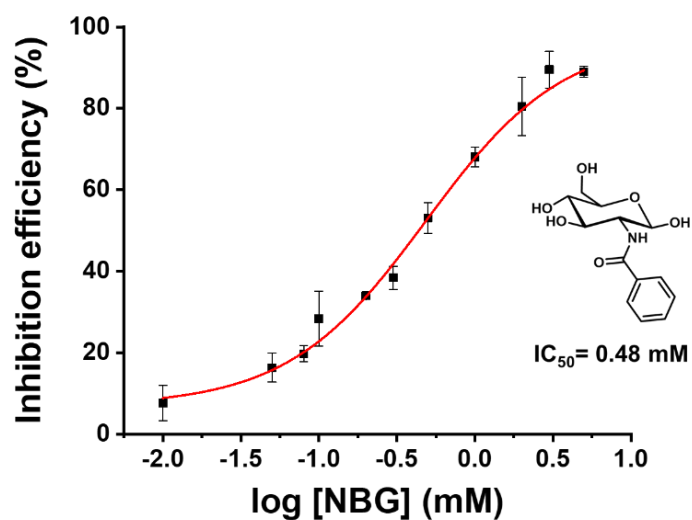

Fig. S15 Inhibition efficiency of NBG for HK.

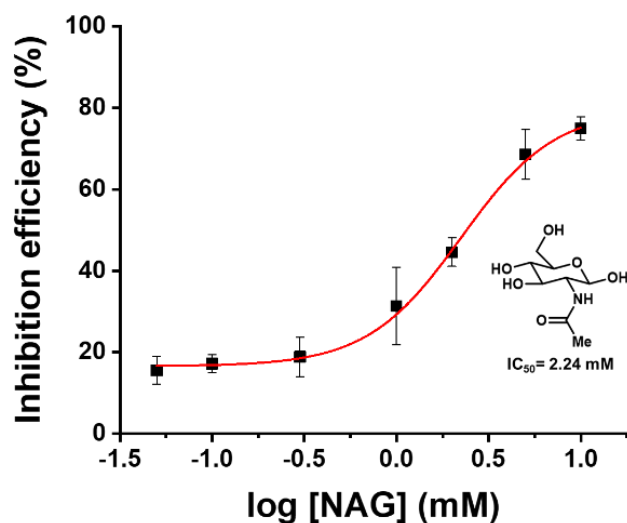

**Fig. S16** Inhibition efficiency of NAG for HK.

To compare with parameter of previous report, the  $IC_{50}$  value was converted to the inhibition constant ( $K_i$ ) using Cheng-Prusoff equation.<sup>s2</sup>

$$\text{Cheng-Prusoff equation: } K_i = IC_{50} / (1 + ([S] / K_m))$$

$K_m$ : Michaelis constant of D-glucose for HK. (0.12 mM from Sigma-Aldrich)

[S]: Concentration of D-glucose.

**Table S3.** Inhibition constant of NAG and NBG for HK.

| Inhibitor | $IC_{50}$ (mM) | $K_i$ (mM) | $K_i$ (mM) from ref. |
|-----------|----------------|------------|----------------------|
| NAG       | 2.24           | 1.22       | 5.1 <sup>s3</sup>    |
| NBG       | 0.48           | 0.26       | 0.33 <sup>s4</sup>   |

### S9.6. Inhibitory assay for AcK using AITC

Acetate kinase (0.4 U/mL) was incubated in a solution containing various concentrations of AITC (0 to 200  $\mu$ M) and  $H_2O_2$  (10 mM). After 5 min of incubation, it was added to a solution containing ABTS (100  $\mu$ M),  $Mn_2(\text{bpm})$  (2  $\mu$ M, 5% DMSO),  $Mg(\text{ClO}_4)_2$  (100  $\mu$ M), sodium acetate (5 mM), and ATP (2  $\mu$ M). With no further incubation, UV-vis spectra were recorded at 414 nm at 10 s intervals for 10 min.

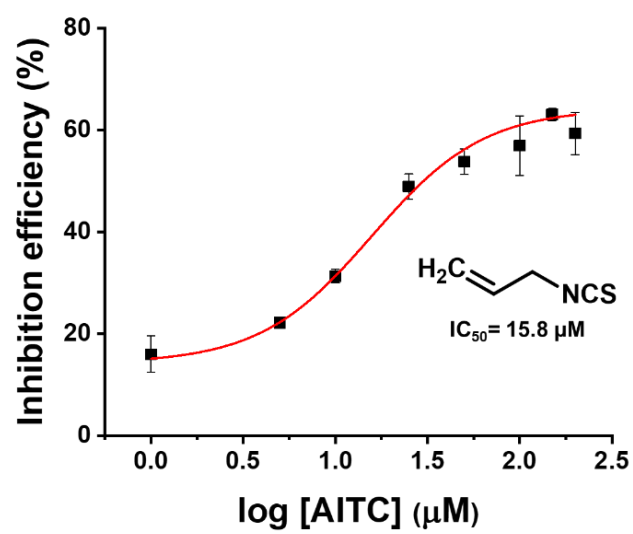

Fig. S17 Inhibition efficiency of AITC for AcK.

**Table S4.** Representative AMP sensors.

| Structure                                                                           | Detection method      | Sensing Selectivity & Association constant                                                                                                                                                                                     | Media                        | LOD ( $\mu\text{M}$ ) | Ref.      |
|-------------------------------------------------------------------------------------|-----------------------|--------------------------------------------------------------------------------------------------------------------------------------------------------------------------------------------------------------------------------|------------------------------|-----------------------|-----------|
| 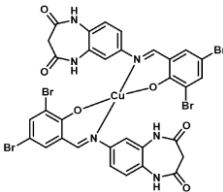   | UV/Vis                | AMP > ADP > ATP<br>$K_a$ (AMP) = $4.0 \times 10^4 \text{ M}^{-1}$<br>$K_a$ (ADP) = $4.1 \times 10^3 \text{ M}^{-1}$<br>$K_a$ (ATP) = $1.2 \times 10^3 \text{ M}^{-1}$                                                          | DMSO/H <sub>2</sub> O (9/1)  | No data               | [S5]      |
|    | Fluorescence          | AMP >> ADP > ATP<br>$K_a$ (AMP) = $2.0 \times 10^4 \text{ M}^{-1}$                                                                                                                                                             | MeCN/H <sub>2</sub> O (95/5) | 1.1                   | [S6]      |
|   | UV/Vis                | AMP > ADP > ATP<br>$K_a$ (AMP) = $7.6 \times 10^4 \text{ M}^{-1}$<br>$K_a$ (ADP) = $3.2 \times 10^4 \text{ M}^{-1}$<br>$K_a$ (ATP) = $3.8 \times 10^3 \text{ M}^{-1}$                                                          | pH 7.0 Tris                  | No data               | [S7]      |
|  | Fluorescence          | AMP > ADP, ATP                                                                                                                                                                                                                 | EtOH/THF (3/1)               | 0.9                   | [S8]      |
|  | Luminescence          | AMP >> ADP, ATP<br>$K_a$ (AMP) = $1.0 \times 10^4 \text{ M}^{-1}$                                                                                                                                                              | pH 7.4 HEPES                 | 2.0                   | [S9]      |
|  | UV/Vis & Colorimetric | AMP >> ADP, ATP<br>$K_a$ (AMP) = $1.47 \times 10^5 \text{ M}^{-1}$                                                                                                                                                             | DMSO/H <sub>2</sub> O (8/2)  | 0.08                  | [S10]     |
|  | UV/Vis & Colorimetric | AMP > ADP >> ATP<br>$K_{a1}$ (AMP) = $4.6 \times 10^3 \text{ M}^{-1}$<br>$K_{a1}$ (AMP) = $2.0 \times 10^4 \text{ M}^{-1}$<br>$K_a$ (ADP) = $2.4 \times 10^5 \text{ M}^{-1}$<br>$K_a$ (ATP) = $1.8 \times 10^6 \text{ M}^{-1}$ | pH 7.0 Tris, 5% DMSO         | 0.5                   | This work |

## S10. References

- [S1] S. Torelli, C. Belle, I. Gautier-Luneau, J. L. Pierre, E. Saint-Aman, J. M. Latour, L. Le Pape and D. Luneau, *Inorg. Chem.*, 2000, **39**, 3526-3536.
- [S2] H. C. Cheng, *J. Pharmacol. Toxicol. Methods*, 2002, **46**, 61-71.
- [S3] R. G. Spiro, *J. Biol. Chem.*, 1958, **233**, 546-550.
- [S4] E. A. Coats, K. A. Skau, C. A. Caperelli and D. Solomacha, *J. Enzyme Inhibition*, 1993, **6**, 271-282.
- [S5] X.-F. Shang, H. Su, H. Lin and H.-K. Lin, *Inorg. Chem. Commun.*, 2010, **13**, 999-1003.
- [S6] N. Singh and D. O. Jang, *Tetrahedron Lett.*, 2011, **52**, 2608-2610.
- [S7] H. Y. Kuchelmeister and C. Schmuck, *Chem. Eur. J.*, 2011, **17**, 5311-5318.
- [S8] V. Bhalla, V. Vij, M. Kumar, P. R. Sharma and T. Kaur, *Org. Lett.*, 2012, **14**, 1012-1015.
- [S9] J. Sahoo, R. Arunachalam, P. S. Subramanian, E. Suresh, A. Valkonen, K. Rissanen and M. Albrecht, *Angew. Chem. Int. Ed.*, 2016, **55**, 9625-9629.
- [S10] R. Kumar, H. Jain, P. Gahlyan, A. Joshi and C. N. Ramachandran, *New J. Chem.*, 2018, **42**, 8567-8576.

## S11. Spectra

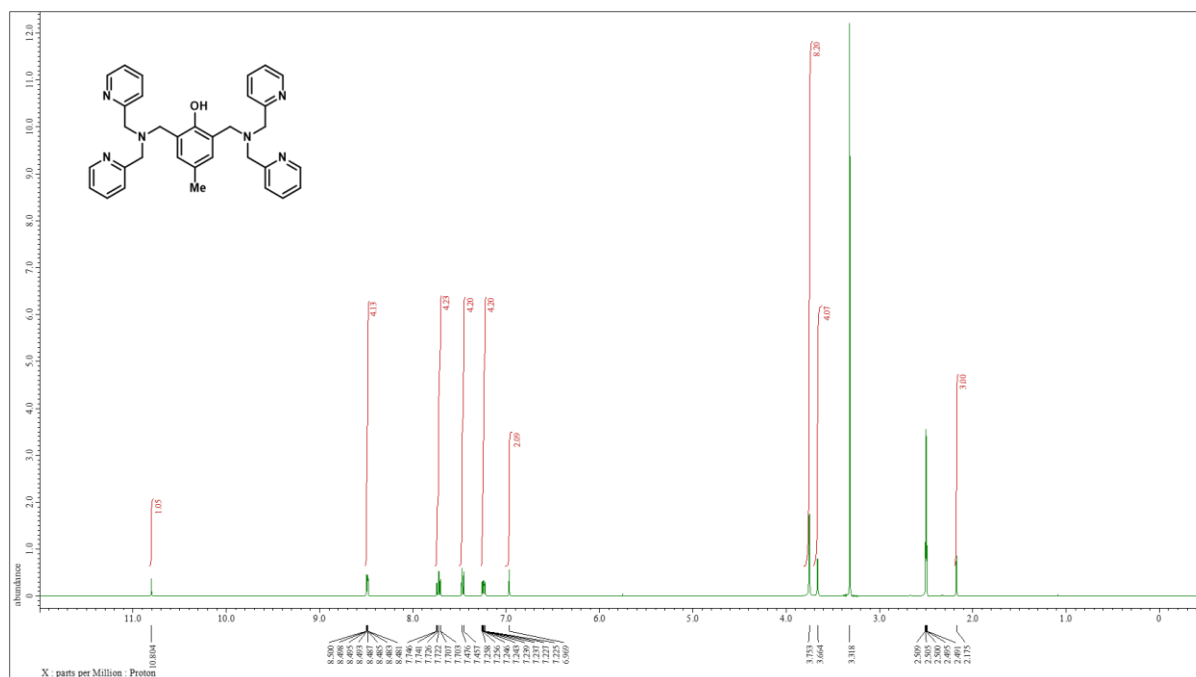

Fig. S18 <sup>1</sup>H NMR spectrum of H-bpmp in DMSO-d<sub>6</sub>.

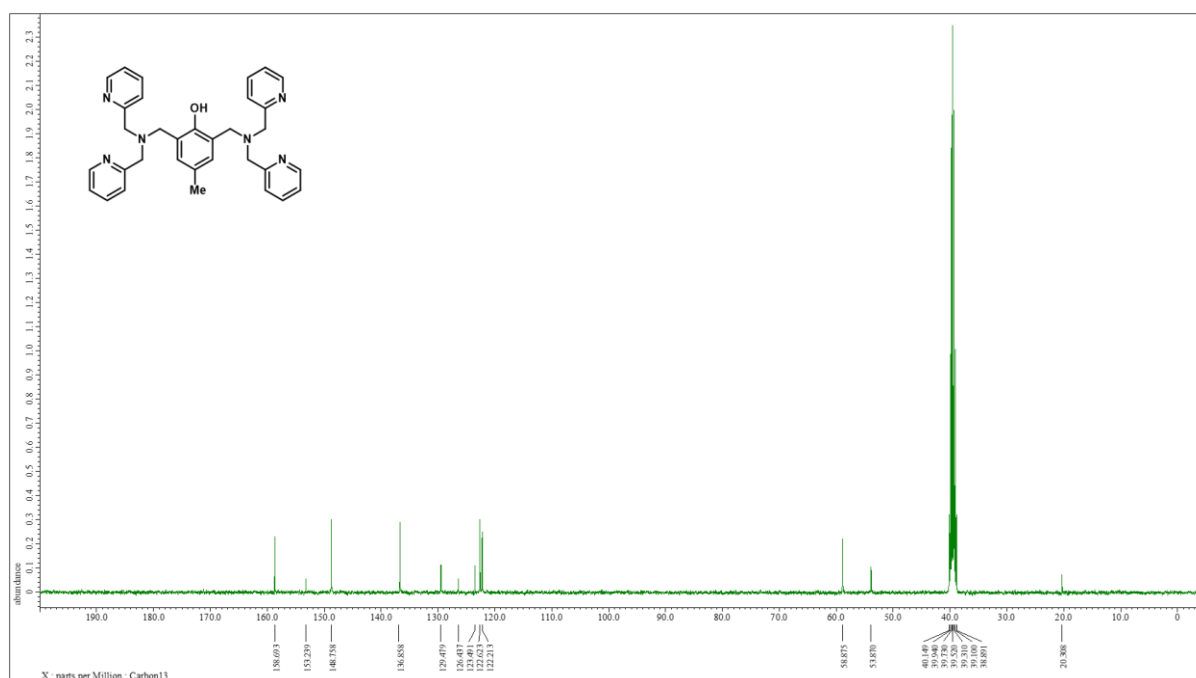

Fig. S19 <sup>13</sup>C NMR spectrum of H-bpmp in DMSO-d<sub>6</sub>.

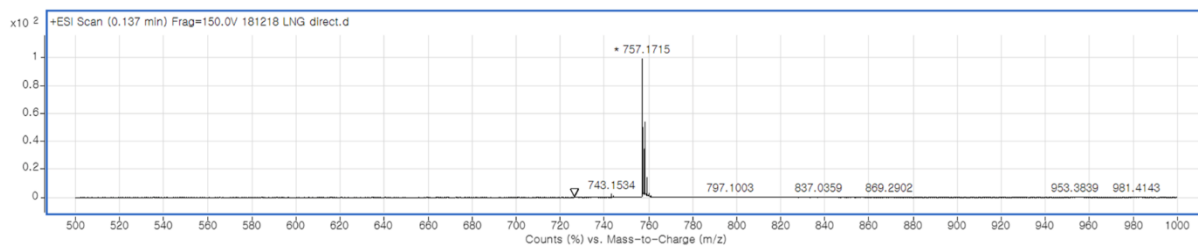

Fig. S20 HRMS spectrum of  $\text{Mn}_2(\text{bpmp})(\text{OAc})_2(\text{ClO}_4)$ .

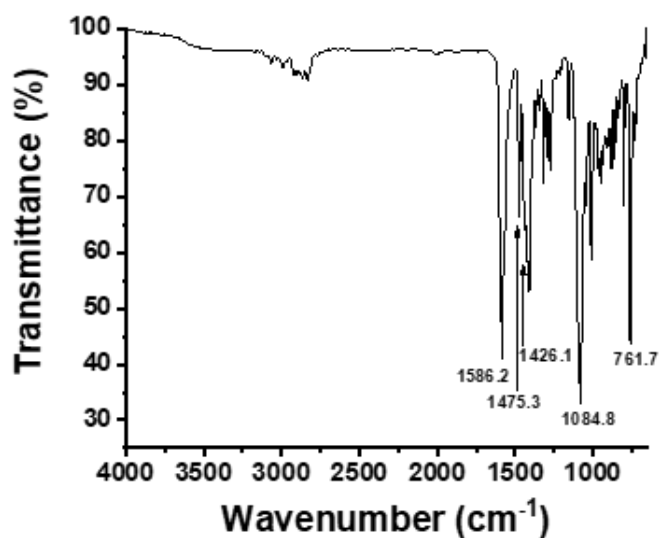

Fig. S21 FT-IR spectrum of  $\text{Mn}_2(\text{bpmp})(\text{OAc})_2(\text{ClO}_4)$ .

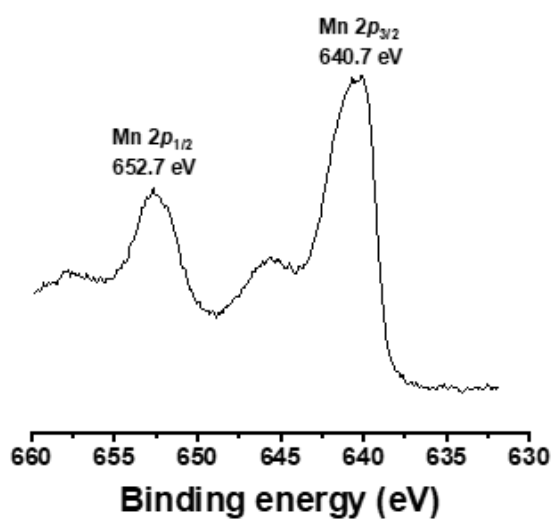

Fig. S22 XPS spectrum of Mn 2p of  $\text{Mn}_2(\text{bpmp})(\text{OAc})_2(\text{ClO}_4)$ .
